# Supplementary material
Source: Elsevier journal article supplement (https://www.sciencedirect.com/science/article/pii/S0048712018301026)
Supplement: mmc1 [file S0048712018301026:mmc1.pdf]

## ANEXO

### INSTRUMENTO DE CALIDAD DE VIDA

NOMBRE: \_\_\_\_\_

EDAD: \_\_\_\_\_

SEXO: \_\_\_\_\_

COD SERIAL: \_\_\_\_\_

#### Sección 1. INFORMACION SOCIODEMOGRAFICA

##### 1. INFORMACION GENERAL

1.1 Tipo de domicilio donde vive la persona con discapacidad

Vivienda familiar \_\_\_\_ Institución \_\_\_\_

1.2. Si su familiar asiste a alguna institución para personas con discapacidad, escriba:

Nombre de la institución: \_\_\_\_\_

Ciudad: \_\_\_\_\_ Localidad o Comuna: \_\_\_\_\_

##### 2. INFORMACION SOBRE USTED

2.1. ¿Cuál es su género?

Masculino \_\_\_\_ Femenino \_\_\_\_

2.2. ¿Cuál es su edad? \_\_\_\_\_

2.3. ¿Qué tipo de parentesco lo une a la persona con discapacidad?

Padre \_\_\_\_ madre \_\_\_\_ Hermano \_\_\_\_ Otro parentesco (Especificar) \_\_\_\_\_

2.5 ¿Cuál es su estado civil?

Viudo \_\_\_\_ Casado \_\_\_\_ Soltero \_\_\_\_ Divorciado \_\_\_\_ Separado \_\_\_\_ Otros \_\_\_\_

2.6 ¿Cuál es su situación laboral?

Trabajo tiempo completo \_\_\_\_ Trabajo tiempo parcial \_\_\_\_ Desempleado pero buscando trabajo \_\_\_\_

Inactivo (por ejemplo, atiende las labores de casa, pensionado, discapacidad) \_\_\_\_

2.7. ¿En qué trabaja? (Especificar) \_\_\_\_\_

2.8. ¿Cuál es el nivel educativo más alto que ha alcanzado?

Sin estudios \_\_\_\_ Bachillerato o estudios secundarios \_\_\_\_ Estudios Primarios \_\_\_\_ Estudios superiores (técnico o tecnológico, universitario, postgrado) \_\_\_\_

2.9. Personas que viven en su mismo hogar, incluyéndose usted.

1. Mama \_\_\_\_ 2. Papa \_\_\_\_ 3. Hermanos \_\_\_\_ 4. pareja \_\_\_\_ 5. hijos \_\_\_\_

6. otro, cual: \_\_\_\_\_

2.10. ¿Cuáles son los ingresos mensuales en su hogar, tenga en cuenta a todas las personas que viven en su mismo hogar? Asegúrese de incluir los ingresos de todas las fuentes (Como pensiones o apoyo a la discapacidad).

Menos de un salario mínimo legal vigente SMLV \_\_\_\_

Un salario mínimo legal vigente SMLV \_\_\_\_

Entre dos y tres salarios mínimos legales vigentes SMLVs \_\_\_\_

Entre cuatro y cinco salarios mínimos legales vigentes SMLVs \_\_\_\_

Más de cinco salarios mínimos legales vigentes SMLVs \_\_\_\_

2.11. ¿Con que frecuencia convive con su familiar con discapacidad?

Fines de semana \_\_\_\_ Diariamente \_\_\_\_ Otra \_\_\_\_Cuál?: \_\_\_\_\_

## SECCION 2. APOYOS Y SERVICIOS

1. Por favor liste cuales son los servicios que el sistema de salud debería ofrecerle para alcanzar la satisfacción de los usuarios:
2. En los últimos tres (3) meses cuál de estos servicios ha recibido. Por favor cuéntenos sobre el tipo de servicios que su familiar con discapacidad necesita y recibe.

| De la siguiente lista de servicios INDIQUE...                                                             | Priorice los servicios que usted cree que necesita | su familiar <b>ha recibido</b> en los últimos 3 meses estos servicios |    | En caso de contestar si ¿qué cantidad de servicio recibe? |                            |            |
|-----------------------------------------------------------------------------------------------------------|----------------------------------------------------|-----------------------------------------------------------------------|----|-----------------------------------------------------------|----------------------------|------------|
|                                                                                                           |                                                    | No                                                                    | si | Alguno                                                    | Alguno, pero no suficiente | suficiente |
| 1. Equipo especial para ayudar a su familiar con discapacidad a vivir (ayudas técnicas y de comunicación) |                                                    |                                                                       |    |                                                           |                            |            |
| 2. Servicios de salud (evaluaciones médicas, nutrición, enfermería)                                       |                                                    |                                                                       |    |                                                           |                            |            |
| 3. Servicios de audición y/o vista                                                                        |                                                    |                                                                       |    |                                                           |                            |            |
| 4. Fisioterapia o terapia ocupacional                                                                     |                                                    |                                                                       |    |                                                           |                            |            |
| 5. Servicios del habla o lenguaje                                                                         |                                                    |                                                                       |    |                                                           |                            |            |
| 6. Servicios de educación especial                                                                        |                                                    |                                                                       |    |                                                           |                            |            |
| 7. Servicios de orientación y psicológicos                                                                |                                                    |                                                                       |    |                                                           |                            |            |
| 8. Apoyo conductual (modificación de conductas problemáticas)                                             |                                                    |                                                                       |    |                                                           |                            |            |
| 9. Servicios de transporte y movilidad                                                                    |                                                    |                                                                       |    |                                                           |                            |            |
| 10. Entrenamiento de habilidades de auto- cuidado (ejemplo: ayuda con el vestido o uso del baño)          |                                                    |                                                                       |    |                                                           |                            |            |
| 11. Coordinación entre diferentes servicios (Equipo interdisciplinario)                                   |                                                    |                                                                       |    |                                                           |                            |            |
| 12. Servicios de orientación vocacional o profesional                                                     |                                                    |                                                                       |    |                                                           |                            |            |
| 13. Servicios de empleo o formación para el empleo                                                        |                                                    |                                                                       |    |                                                           |                            |            |
| 14. Otros (por favor descríbalos):                                                                        |                                                    |                                                                       |    |                                                           |                            |            |

B. Por favor cuéntenos sobre el tipo de servicios que su **familia** necesita y recibe.

| De la siguiente lista de servicios INDIQUE...                                                         | Si su familia <b>lo necesita</b> en la actualidad |    | En caso de contestar si ¿qué cantidad de servicio recibe? |                            |            |
|-------------------------------------------------------------------------------------------------------|---------------------------------------------------|----|-----------------------------------------------------------|----------------------------|------------|
| Servicios para su familia                                                                             | Si                                                | No | Ninguno                                                   | Alguno, pero no suficiente | Suficiente |
| 15. Una persona de la familia o externo que los remplace en el cuidado de la persona con discapacidad |                                                   |    |                                                           |                            |            |

|                                                                                                        |  |  |  |  |  |
|--------------------------------------------------------------------------------------------------------|--|--|--|--|--|
| 16. Cuidador de la persona con discapacidad                                                            |  |  |  |  |  |
| 17. Dinero para ayudar a pagar los servicios o los apoyos requeridos para el familiar con discapacidad |  |  |  |  |  |
| 18. Servicios de ayuda al mantenimiento de la casa, apoyo doméstico (empleada)                         |  |  |  |  |  |
| 19. Transporte                                                                                         |  |  |  |  |  |
| 20. Grupos de apoyo                                                                                    |  |  |  |  |  |
| 21. Orientación con relación a la atención a la discapacidad                                           |  |  |  |  |  |
| 22. Apoyo a los hermanos de la persona con discapacidad                                                |  |  |  |  |  |
| 23. Formación a los padres o a la familia                                                              |  |  |  |  |  |
| 24. Información específica sobre la discapacidad                                                       |  |  |  |  |  |
| 25. Información sobre donde conseguir servicios para su familiar con discapacidad                      |  |  |  |  |  |
| 26. Información sobre donde conseguir servicios para su familia                                        |  |  |  |  |  |
| 27. Información sobre derechos legales                                                                 |  |  |  |  |  |
| 28. Otros (Por favor descríbalos):                                                                     |  |  |  |  |  |

### Sección 3. CALIDAD DE VIDA FAMILIAR

| SEÑALAR CON UN CIRCULO LA PUNTUACION ADECUADA                                                            | Que tan importante es que... | Que tan satisfecho estoy yo con ello... |
|----------------------------------------------------------------------------------------------------------|------------------------------|-----------------------------------------|
| Mi familia disfrute el tiempo que pasa reunida.                                                          | 1 2 3 4 5                    | 1 2 3 4 5                               |
| Mi familia sea capaz de manejar los altibajos de la vida.                                                | 1 2 3 4 5                    | 1 2 3 4 5                               |
| Mi familia tenga esperanza en el futuro.                                                                 | 1 2 3 4 5                    | 1 2 3 4 5                               |
| Los miembros de mi familia nos apoyemos unos a otros para lograr las metas.                              | 1 2 3 4 5                    | 1 2 3 4 5                               |
| Los miembros de mi familia conversemos abiertamente unos con otros.                                      | 1 2 3 4 5                    | 1 2 3 4 5                               |
| Mi familia resuelva los problemas juntos.                                                                | 1 2 3 4 5                    | 1 2 3 4 5                               |
| Los miembros de mi familia mostremos que nos queremos y cuidamos mutuamente.                             | 1 2 3 4 5                    | 1 2 3 4 5                               |
| Los miembros de mi familia tengamos buenas relaciones con la familia extensa (abuelos, cuñados, etc)     | 1 2 3 4 5                    | 1 2 3 4 5                               |
| Los miembros de mi familia estemos orgullosos unos de los otros.                                         | 1 2 3 4 5                    | 1 2 3 4 5                               |
| Los miembros de mi familia ayudemos a los niños con las tareas y actividades escolares y de formación.   | 1 2 3 4 5                    | 1 2 3 4 5                               |
| Los miembros de mi familia enseñemos a los niños como ayudar en el trabajo de la casa.                   | 1 2 3 4 5                    | 1 2 3 4 5                               |
| Los adultos en mi familia conozcamos otras personas en la vida de los niños (amigos, profesores, etc.)   | 1 2 3 4 5                    | 1 2 3 4 5                               |
| Los miembros de mi familia enseñemos a los niños como llevarse bien con otros.                           | 1 2 3 4 5                    | 1 2 3 4 5                               |
| Los adultos en mi familia tengamos la información necesaria para tomar decisiones acerca de los niños.   | 1 2 3 4 5                    | 1 2 3 4 5                               |
| Los adultos en mi familia enseñemos a los niños a tomar buenas decisiones.                               | 1 2 3 4 5                    | 1 2 3 4 5                               |
| Los adultos en mi familia tengamos tiempo para atender las necesidades individuales de cada niño.        | 1 2 3 4 5                    | 1 2 3 4 5                               |
| Los miembros de mi familia ayudemos a los niños a aprender a ser independientes.                         | 1 2 3 4 5                    | 1 2 3 4 5                               |
| Mi familia sea físicamente sana.                                                                         | 1 2 3 4 5                    | 1 2 3 4 5                               |
| Mi familia obtenga servicio médico cuando lo necesita.                                                   | 1 2 3 4 5                    | 1 2 3 4 5                               |
| Mi familia obtenga servicio odontológico cuando lo necesita.                                             | 1 2 3 4 5                    | 1 2 3 4 5                               |
| Mi familia sea emocionalmente saludable.                                                                 | 1 2 3 4 5                    | 1 2 3 4 5                               |
| Los miembros de mi familia nos cuidemos unos a otros cuando alguno está enfermo.                         | 1 2 3 4 5                    | 1 2 3 4 5                               |
| Mi familia tenga servicio de entidades de salud que conozcan nuestras necesidades individuales de salud. | 1 2 3 4 5                    | 1 2 3 4 5                               |
| Mi familia se sienta segura en casa, el trabajo, el colegio y en nuestro vecindario.                     | 1 2 3 4 5                    | 1 2 3 4 5                               |
| Mi familia se realice chequeos médicos regulares.                                                        | 1 2 3 4 5                    | 1 2 3 4 5                               |
| Mi familia reciba ayuda externa para las tareas rutinarias y los mandados cuando lo necesita.            | 1 2 3 4 5                    | 1 2 3 4 5                               |
| Los miembros de mi familia cuenten con recursos para desplazarse hacia los sitios donde necesitan estar. | 1 2 3 4 5                    | 1 2 3 4 5                               |
| Mi familia se sienta apoyada por nuestros grupos sociales, espirituales o culturales.                    | 1 2 3 4 5                    | 1 2 3 4 5                               |

|                                                                                                                                                                      |           |           |
|----------------------------------------------------------------------------------------------------------------------------------------------------------------------|-----------|-----------|
| Mi familia disponga de ayuda externa para que podamos cuidar de las necesidades individuales de toda la familia.                                                     | 1 2 3 4 5 | 1 2 3 4 5 |
| Mi familia tenga el apoyo que nosotros necesitamos para bajar el estrés.                                                                                             | 1 2 3 4 5 | 1 2 3 4 5 |
| Mi familia tenga su manera de controlar los gastos.                                                                                                                  | 1 2 3 4 5 | 1 2 3 4 5 |
| Los miembros de mi familia tengamos amigos u otros que nos den apoyo.                                                                                                | 1 2 3 4 5 | 1 2 3 4 5 |
| Los miembros de mi familia tengamos algo de tiempo para perseguir nuestros intereses individuales.                                                                   | 1 2 3 4 5 | 1 2 3 4 5 |
| El miembro de mi familia con discapacidad tenga apoyo para progresar en el colegio o en el lugar de trabajo.                                                         | 1 2 3 4 5 | 1 2 3 4 5 |
| El miembro de mi familia con discapacidad tenga apoyo para progresar en el hogar.                                                                                    | 1 2 3 4 5 | 1 2 3 4 5 |
| El miembro de mi familia con discapacidad tenga apoyo para hacer amigos.                                                                                             | 1 2 3 4 5 | 1 2 3 4 5 |
| El miembro de mi familia con discapacidad tenga apoyo para ser incluido en actividades comunitarias.                                                                 | 1 2 3 4 5 | 1 2 3 4 5 |
| Mi familia tenga apoyo para conseguir los beneficios del gobierno que necesita el miembro de nuestra familia con discapacidad.                                       | 1 2 3 4 5 | 1 2 3 4 5 |
| Mi familia tenga apoyo de las entidades locales para conseguir los servicios que necesita el miembro de nuestra familia con discapacidad.                            | 1 2 3 4 5 | 1 2 3 4 5 |
| Mi familia tenga apoyo para obtener un buen cuidado médico para el miembro de nuestra familia con discapacidad.                                                      | 1 2 3 4 5 | 1 2 3 4 5 |
| Mi familia tenga una buena relación con los profesionales de las instituciones de salud y educativas que trabajan con el miembro de nuestra familia con discapacidad | 1 2 3 4 5 | 1 2 3 4 5 |

| # | IMPORTANCIA             | SATISFACCION     |
|---|-------------------------|------------------|
| 1 | Poco importante         | Muy insatisfecho |
| 2 | Algo importante         | Insatisfecho     |
| 3 | Medianamente importante | Neutral          |
| 4 | Muy importante          | Satisfecho       |
| 5 | Crucialmente importante | Muy satisfecho   |

## MAPA DE CALIDAD DE VIDA FAMILIAR

|                                |                                                                                       | Muy insatisfecho | Insatisfecho | Neutral | Satisfecho | Muy satisfecho |
|--------------------------------|---------------------------------------------------------------------------------------|------------------|--------------|---------|------------|----------------|
| <b>Poco importante</b>         | Interacción<br>Rol parental<br>Salud/Seguridad<br>Recursos<br>Apoyo a la discapacidad |                  |              |         |            |                |
| <b>Algo importante</b>         | Interacción<br>Rol parental<br>Salud/Seguridad<br>Recursos<br>Apoyo a la discapacidad |                  |              |         |            |                |
| <b>Medianamente importante</b> | Interacción<br>Rol parental<br>Salud/Seguridad<br>Recursos<br>Apoyo a la discapacidad |                  |              |         |            |                |
| <b>Muy importante</b>          | Interacción                                                                           |                  |              |         |            |                |
|                                | Rol parental                                                                          |                  |              |         |            |                |
|                                | Salud/Seguridad                                                                       |                  |              |         |            |                |
|                                | Recursos                                                                              |                  |              |         |            |                |
|                                | Apoyo a la discapacidad                                                               |                  |              |         |            |                |
| <b>Crucialmente importante</b> | Interacción                                                                           |                  |              |         |            |                |
|                                | Rol parental                                                                          |                  |              |         |            |                |
|                                | Salud/Seguridad                                                                       |                  |              |         |            |                |
|                                | Recursos                                                                              |                  |              |         |            |                |
|                                | Apoyo a la discapacidad                                                               |                  |              |         |            |                |

**FAMILIA:** \_\_\_\_\_

**Fecha:** \_\_\_\_\_
